# Supplementary material for: Mechanism for inverted-repeat recombination induced by a replication fork barrier
Source: PubMed Central journal article supplement (PMC8748988; doi:10.1038/s41467-021-27443-w), 2022-01-10
Supplement: 41467_2021_27443_MOESM1_ESM.pdf [file 41467_2021_27443_MOESM1_ESM.pdf]

# Mechanism for inverted-repeat recombination induced by a replication fork barrier

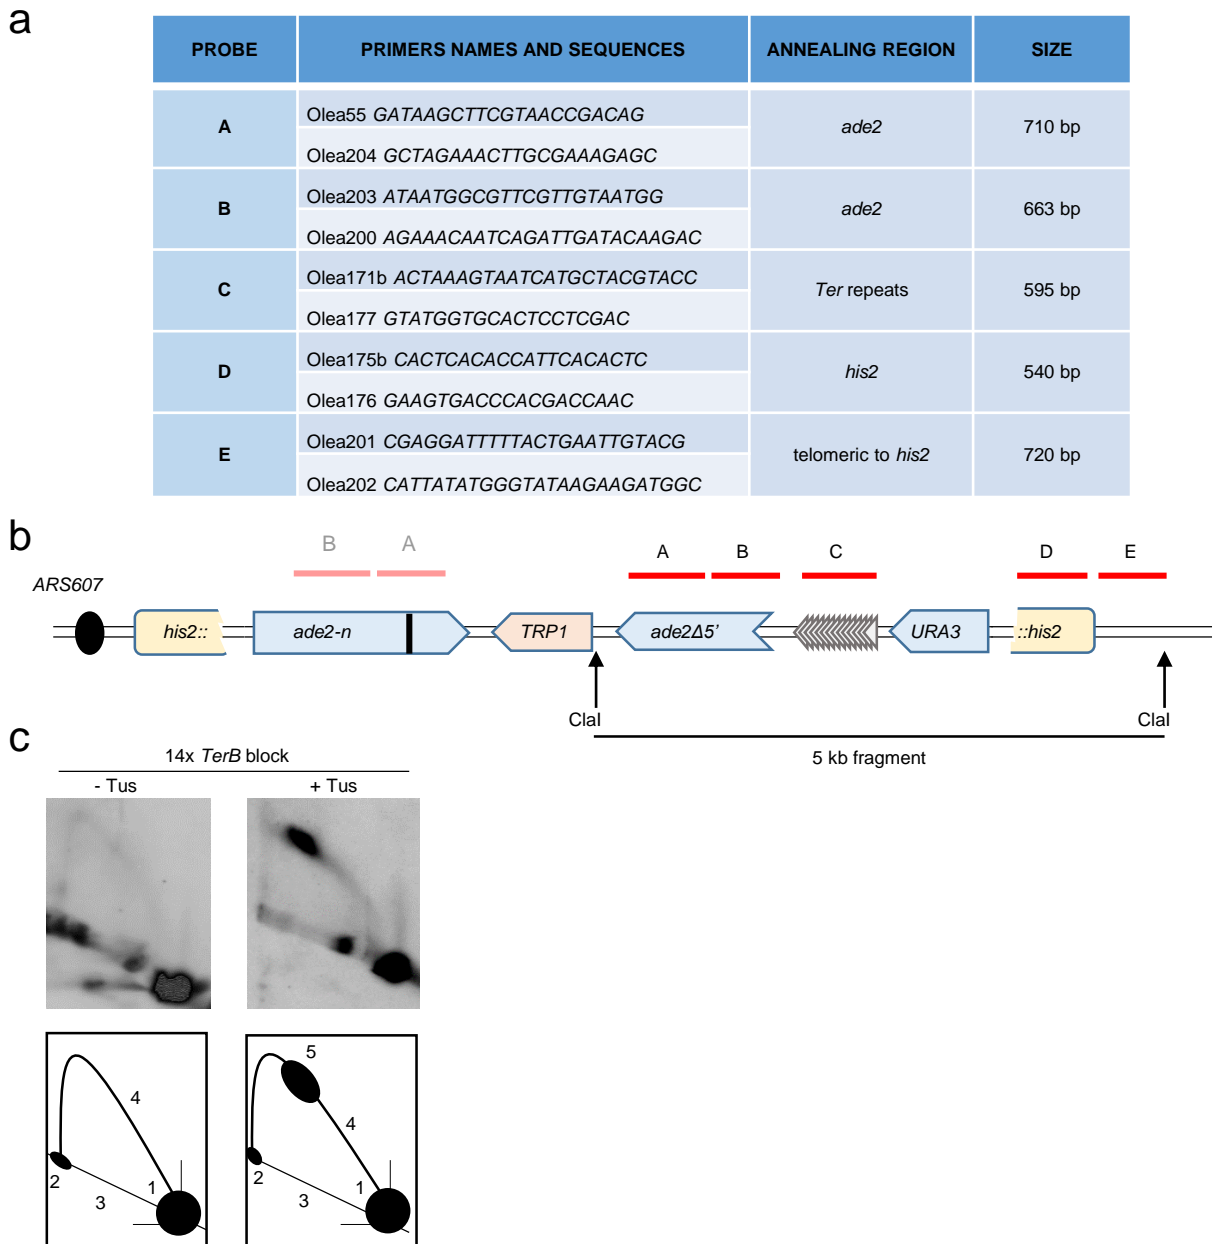

**Supplementary Fig. 1. Two-dimensional gel analysis of replication intermediates.** **a** Table of oligonucleotides used to generate radiolabelled probes for hybridization. **b** Schematic of the digestion fragment detected by 2D gel. Radiolabeled probes are represented by red lines and cover 3.2 kb of the digested 5 kb fragment. Probes A and B anneal to the two *ade2* repeats. After *Clal* digestion, the *ade2-n* repeat is part of a 11.2 kb fragment which does not interfere with detection of the signal from the smaller 5 kb fragment containing the *Ter* repeats. **c** Interpretation of 2D gel analysis images. 1 = *Clal* fragment before replication. 2 = *Clal* fragment after almost complete replication. 3 = non specific linear DNA. 4 = arc of Y-shaped replication intermediates. 5 = fork stall corresponding to the position of the *Tus/Ter* barrier.

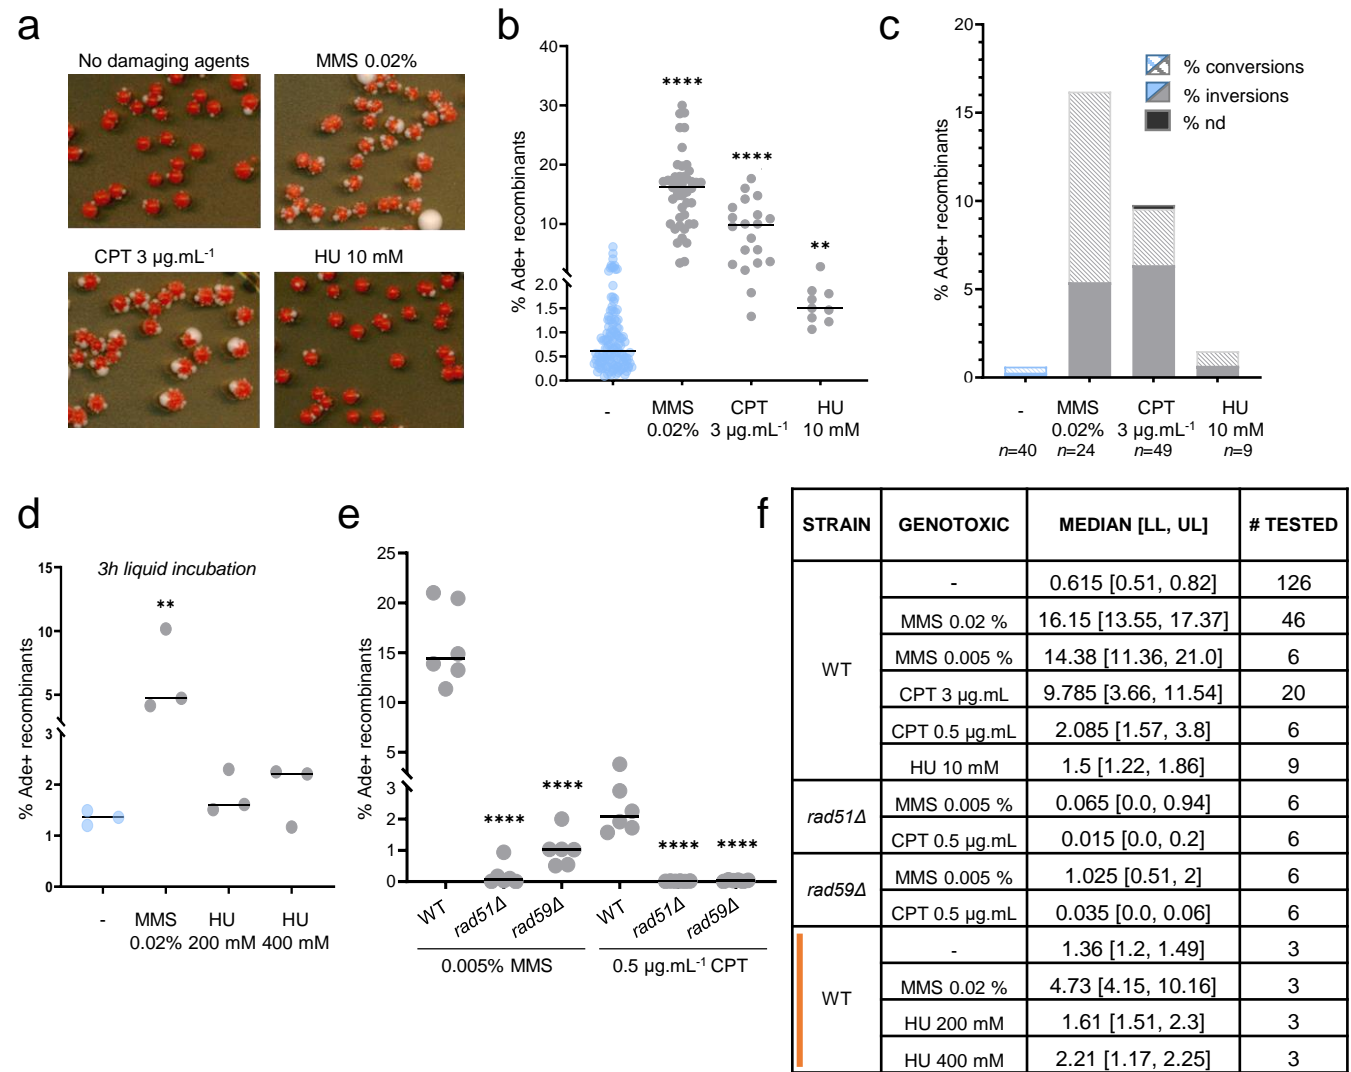

**Supplementary Fig. 2. Genome wide replication stress induces Rad51 and Rad59-dependent NAHR at inverted repeats.** **a** Colonies form more white sectors (indicative of Ade<sup>+</sup> phenotype) on plates containing genotoxic agents inducing replication stress. **b** Ade<sup>+</sup> recombination frequencies without (blue data points) and with (grey data points) genotoxic agents. Concentrations from 2 mM to 150 mM HU were tested and showed comparable results. Black lines indicate medians. P-values were obtained on log transformed data by one-way Anova with a Bonferroni post-test and are relative to the NO genotoxic agent data with \*\*\*\* p-value <0.0001, \*\* p-value <0.005. **c** Distribution of NAHR events, with and without genotoxic agents, scored by PCR. *n* indicates the number of independent events examined for each strain. **d** Ade<sup>+</sup> recombination frequencies after 3 h liquid incubation with MMS and high concentrations of HU. The experiment was repeated 3 times with 9 independent cultures. One repeat is shown. P-values were obtained on log transformed data by one-way Anova with a Bonferroni post-test and are relative to the NO genotoxic agent data with \*\* p-value <0.005. **e** Ade<sup>+</sup> recombination frequencies with low concentrations of MMS and CPT in the WT and mutant strains. Black lines indicate medians. P-values, reported as stars when significant, are relative to the WT strain in the same condition and were obtained on log transformed data by one-way Anova with a Bonferroni post-test : \*\*\*\* p-value <0.0001. **f** Quantification of Ade<sup>+</sup> recombinants in the different strains in presence of genotoxic agents. >95% confidence intervals to the median are indicated as [LL, UL], where LL is the lower limit and UL is the upper limit. The orange line indicates quantifications from liquid incubations. **b-e** Exact p-values are reported in Supplementary Data 1. Source data are provided as a Source Data file.

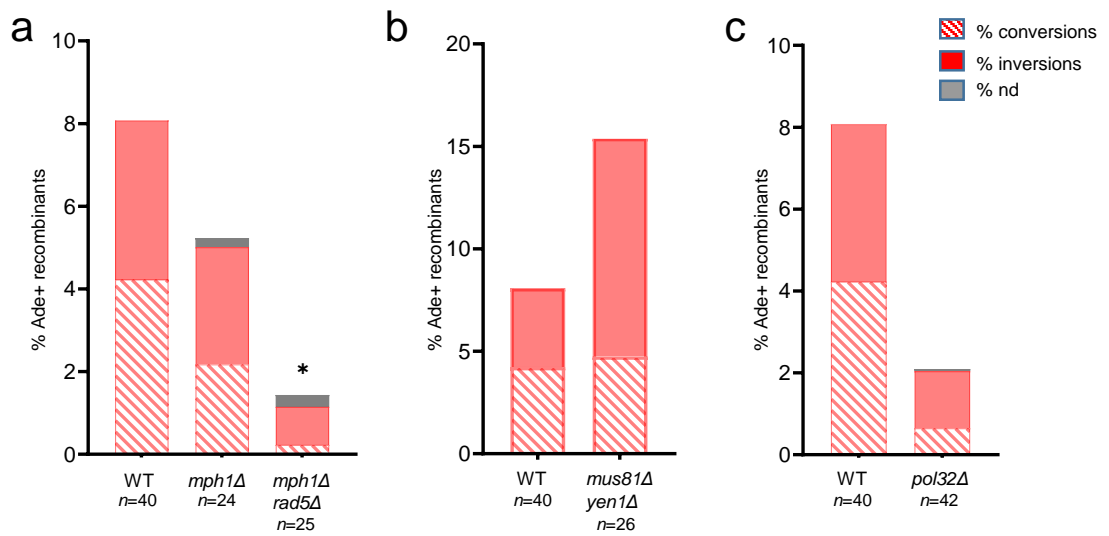

**Supplementary Fig. 3. Distribution of NAHR events in WT and mutant strains.** **a** Distribution of NAHR events in the WT, *mph1Δ* and *mph1Δ rad5Δ* strains, in response to the Tus/*Ter* block, scored by PCR. **b** Distribution of NAHR events in the WT and *mus81Δ yen1Δ* strain, scored by PCR. **c** Distribution of NAHR events in the WT and *pol32Δ* strains, scored by PCR. **a-c** nd= structure could not be determined by PCR. *n* indicates the number of independent Ade<sup>+</sup> recombinants tested. P-values, reported as stars when significant, were obtained by Chi-Square test and are relative to the WT strain: \* p-value <0.05. Exact p-values are reported in Supplementary Data 1 and source data are provided as a Source Data file.

**a** Short-tract DNA synthesis after fork regression

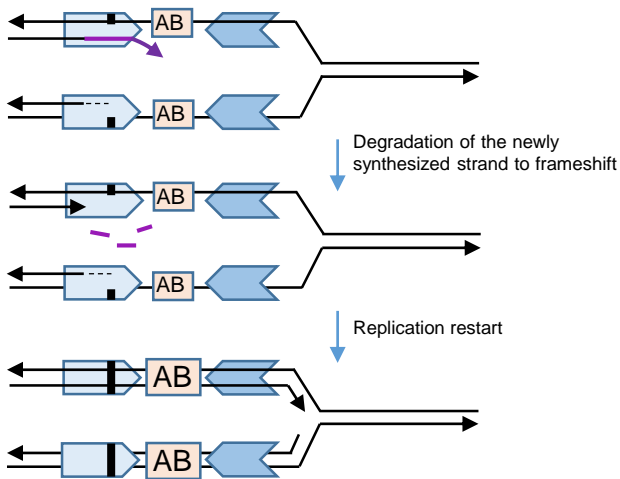

**b** Long-tract DNA synthesis after fork regression

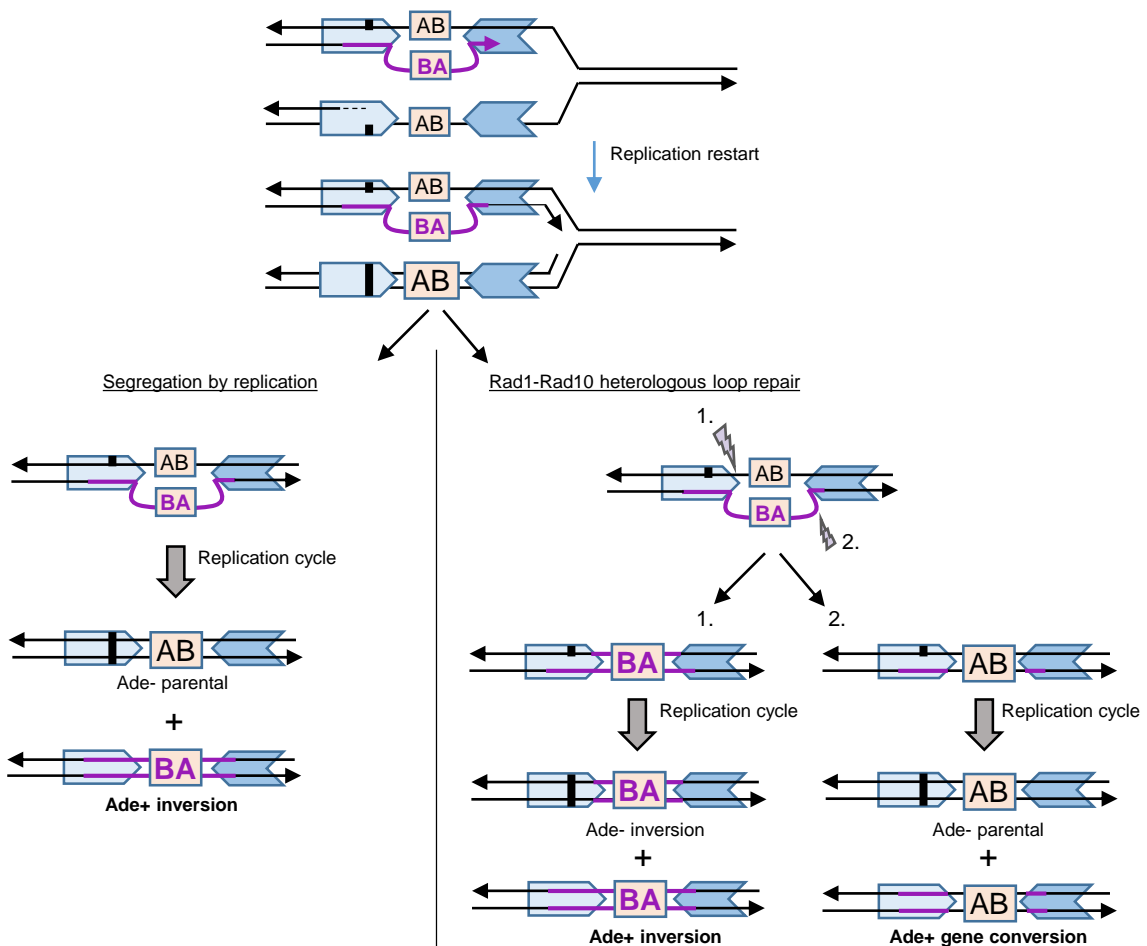

**Supplementary Fig. 4. Alternative model for the late stages of replication-associated NAHR.** **a** After fork regression, short-tract DNA synthesis forms a heterologous tail that is degraded by nucleases and no recombinant can form. **b** Long-tract DNA synthesis leads to the formation of a long heterologous loop between the repetitive sequences. The letters AB represent the orientation of the intervening sequence. Left panel shows resolution of the heterologous loop on the top arm by segregation of the unpaired strands at the next replication cycle. Right panel shows repair of the heterologous loop on the top arm by Rad1-Rad10 cleavage and DNA synthesis. Cleavage in positions 1 or 2 produces different outcomes. The bold black line indicates the +2 frameshift mutation in the long *ade2* cassette. Only cells without the frameshift are Ade<sup>+</sup> and can be detected as recombinants. The mismatch repair pathway could also be involved in repairing the frameshift mutation.

**Supplementary Table 1. Ade<sup>+</sup> recombination frequencies**

| STRAIN                        | MEDIAN [LL, UL]    | N <sup>b</sup> | MEDIAN [LL, UL]      | N <sup>b</sup> |
|-------------------------------|--------------------|----------------|----------------------|----------------|
| no <i>Ter</i>                 | 0.47 [0.15, 0.78]  | 14             | 0.295 [0.06, 0.64]   | 10             |
| perm <i>Ter</i>               | 0.87 [0.25, 2.4]   | 12             | 0.345 [0.16, 0.54]   | 12             |
| WT = block <i>Ter</i>         | 0.615 [0.51, 0.82] | 126            | 8.08 [6.96, 9.27]    | 127            |
| <i>rad51</i> Δ                | 0.39 [0.24, 0.49]  | 54             | 0.32 [0.26, 0.68]    | 53             |
| <i>rad59</i> Δ                | 0.46 [0.28, 0.72]  | 24             | 0.73 [0.45, 1.57]    | 18             |
| <i>rad51</i> Δ <i>rad59</i> Δ | 0.0 [0.0, 0.0]     | 6              | 0.0 [0.0, 0.0]       | 6              |
| <i>rad52</i> Δ                | 0.0 [0.0, 0.0]     | 21             | 0.0 [0.0, 0.0]       | 22             |
| <i>rad51-II3A</i>             | 0.205 [0.16, 0.28] | 28             | 0.24 [0.14, 0.5]     | 22             |
| <i>rad52-R70A</i>             | 0.145 [0.04, 0.21] | 12             | 0.36 [0.18, 0.41]    | 12             |
| <i>rad57</i> Δ                | 0.055 [0.01, 0.23] | 24             | 0.1 [0.05, 0.24]     | 23             |
| <i>rad57</i> Δ <i>srs2</i> Δ  | 0.235 [0.21, 0.42] | 12             | 0.635 [0.4, 1.17]    | 12             |
| <i>srs2</i> Δ                 | 1.15 [0.96, 1.38]  | 28             | 47.61 [28.8, 60]     | 28             |
| <i>csm2</i> Δ                 | 1.33 [0.8, 1.89]   | 18             | 3.585 [2.41, 4.6]    | 18             |
| <i>rad54</i> Δ                | 0.06 [0.02, 0.18]  | 12             | 0.31 [0.12, 1.15]    | 12             |
| <i>rad5</i> Δ                 | 0.9 [0.6, 1.3]     | 30             | 9.775 [5.9, 14.5]    | 30             |
| <i>mph1</i> Δ                 | 0.77 [0.52, 0.97]  | 12             | 5.225 [2.04, 7.0]    | 12             |
| <i>rad5</i> Δ <i>mph1</i> Δ   | 0.24 [0.16, 0.65]  | 24             | 1.435 [1.06, 3.13]   | 24             |
| <i>mre11</i> Δ                | 0.2 [0.04, 0.33]   | 12             | 2.295 [1.33, 3.67]   | 12             |
| <i>exo1</i> Δ                 | 0.85 [0.33, 1.25]  | 14             | 0.405 [0.25, 0.83]   | 14             |
| <i>sgs1</i> Δ                 | 1.065 [0.62, 1.28] | 24             | 13.73 [8.51, 28.95]  | 20             |
| <i>rad1</i> Δ                 | 0.245 [0.13, 0.32] | 12             | 1.0 [0.38, 1.65]     | 12             |
| <i>mus81</i> Δ                | 0.695 [0.55, 0.88] | 30             | 10.39 [7.2, 14.35]   | 30             |
| <i>mus81</i> Δ <i>yen1</i> Δ  | 0.11 [0.09, 0.24]  | 18             | 15.45 [11.75, 17.20] | 12             |
| <i>pol32</i> Δ                | 0.265 [0.12, 0.54] | 18             | 2.08 [1.21, 3.13]    | 24             |
| <i>rev3</i> Δ                 | 0.96 [0.48, 1.52]  | 12             | 12.88 [8.52, 21.36]  | 12             |
| <i>pol32</i> Δ <i>rev3</i> Δ  | 0.395 [0.2, 1.04]  | 6              | 1.715 [0.9, 3.35]    | 12             |
| <i>pif1-m2</i>                | 0.49 [0.34, 0.66]  | 12             | 7.29 [4.95, 10.76]   | 12             |
| <i>pif1-m2 dna2</i> Δ         | 0.67 [0.41, 1.17]  | 12             | 2.14 [1.18, 3.9]     | 12             |

Blue data were obtained without Tus expression. Red data were obtained with Tus expression. All the mutant strains contain 14x*Ter* in the blocking orientation. For all strains, >95% confidence intervals to the median are indicated as [LL, UL], where LL is the lower limit and UL is the upper limit. N<sup>b</sup> = number of independent colonies tested; perm= permissive orientation; block= blocking orientation.

Supplementary Table 2. Yeast strains

| STRAIN      | RELEVANT GENOTYPE                                                                                | USE                 |
|-------------|--------------------------------------------------------------------------------------------------|---------------------|
| LSY2002-9D  | <i>his3::ade2Δ5'-TRP1-ade2-n</i>                                                                 | Strain construction |
| LS4040      | <i>his2::ade2-n-TRP1- ade2Δ5'</i>                                                                | Strain construction |
| LSY4577     | <i>his2::ade2-n-TRP1- ade2Δ5' leu2::Gal-TUS-LEU2MX</i>                                           | Recombination assay |
| LSY4579-1   | <i>his2::ade2-n-TRP1- ade2Δ5'-perm14xTerB-URA3 leu2::Gal-TUS-LEU2MX</i>                          | Recombination assay |
| LSY4581-2   | <i>his2::ade2-n-TRP1- ade2Δ5'-block14xTerB-URA3 leu2::Gal-TUS-LEU2MX</i>                         | Recombination assay |
| LSY4583     | <i>his2::ade2-n-TRP1- ade2Δ5'-block14xTerB-URA3 leu2::Gal-TUS-LEU2MX rad59::LEU2</i>             | Recombination assay |
| LSY4584     | <i>his2::ade2-n-TRP1- ade2Δ5'-block14xTerB-URA3 leu2::Gal-TUS-LEU2MX rad59::LEU2 rad51::HIS3</i> | Recombination assay |
| LSY4585     | <i>his2::ade2-n-TRP1- ade2Δ5'-block14xTerB-URA3 leu2::Gal-TUS-LEU2MX rad51::HIS3</i>             | Recombination assay |
| LSY5127     | <i>his2::ade2-n-TRP1- ade2Δ5'-block14xTerB-URA3 leu2::Gal-TUS-LEU2MX rad52::TRP1</i>             | Recombination assay |
| LSY4618-1   | <i>his2::ade2-n-TRP1- ade2Δ5'-block14xTerB-URA3 leu2::Gal-TUS-LEU2MX rad51-II3A-KanMX</i>        | Recombination assay |
| LSY5122     | <i>his2::ade2-n-TRP1- ade2Δ5'-block14xTerB-URA3 leu2::Gal-TUS-LEU2MX rad57::LEU2</i>             | Recombination assay |
| LSY5134     | <i>his2::ade2-n-TRP1- ade2Δ5'-block14xTerB-URA3 leu2::Gal-TUS-LEU2MX srs2::TRP1</i>              | Recombination assay |
| LSY5013-12C | <i>his2::ade2-n-TRP1- ade2Δ5'-block14xTerB-URA3 leu2::Gal-TUS-LEU2MX srs2::TRP1 rad57::LEU2</i>  | Recombination assay |
| LSY5123     | <i>his2::ade2-n-TRP1- ade2Δ5'-block14xTerB-URA3 leu2::Gal-TUS-LEU2MX csm2::KanMX</i>             | Recombination assay |
| LSY5128-1   | <i>his2::ade2-n-TRP1- ade2Δ5'-block14xTerB-URA3 leu2::Gal-TUS-LEU2MX rad54::LEU2</i>             | Recombination assay |
| LSY4459-1   | <i>his2::ade2-n-TRP1- ade2Δ5'-block14xTerB-URA3 leu2::Gal-TUS-LEU2MX rad5::URA3</i>              | Recombination assay |
| LSY5130     | <i>his2::ade2-n-TRP1- ade2Δ5'-block14xTerB-URA3 leu2::Gal-TUS-LEU2MX mph1::KanMX</i>             | Recombination assay |
| LSY5132     | <i>his2::ade2-n-TRP1- ade2Δ5'-block14xTerB-URA3 leu2::Gal-TUS-LEU2 mph1::KanMX rad5::URA3</i>    | Recombination assay |
| LSY5124-1   | <i>his2::ade2-n-TRP1- ade2Δ5'-block14xTerB-URA3 leu2::Gal-TUS-LEU2MX mre11::LEU2</i>             | Recombination assay |
| LSY4620     | <i>his2::ade2-n-TRP1- ade2Δ5'-block14xTerB-URA3 leu2::Gal-TUS-LEU2MX sgs1::HIS3</i>              | Recombination assay |
| LSY4621-1   | <i>his2::ade2-n-TRP1- ade2Δ5'-block14xTerB-URA3 leu2::Gal-TUS-LEU2MX exo1::KanMX</i>             | Recombination assay |
| LSY5135     | <i>his2::ade2-n-TRP1- ade2Δ5'-block14xTerB-URA3 leu2::Gal-TUS-LEU2MX rad1::LEU2</i>              | Recombination assay |
| LSY5129     | <i>his2::ade2-n-TRP1- ade2Δ5'-block14xTerB-URA3 leu2::Gal-TUS-LEU2MX mus81::KanMX</i>            | Recombination assay |
| LSY5133-1   | <i>his2::ade2-n-TRP1- ade2Δ5'-block14xTerB-URA3 leu2::Gal-TUS-LEU2MX mus81::KanMX yen1::HIS3</i> | Recombination assay |
| LSY4592-1   | <i>his2::ade2-n-TRP1- ade2Δ5'-block14xTerB-URA3 leu2::Gal-TUS-LEU2MX pol32::KanMX</i>            | Recombination assay |
| LSY5125-1   | <i>his2::ade2-n-TRP1- ade2Δ5'-block14xTerB-URA3 leu2::Gal-TUS-LEU2MX pol32::KanMX rev3::HIS3</i> | Recombination assay |
| LSY5126     | <i>his2::ade2-n-TRP1- ade2Δ5'-block14xTerB-URA3 leu2::Gal-TUS-LEU2MX rev3::HIS3</i>              | Recombination assay |
| LSY5067-15  | <i>his2::ade2-n-TRP1- ade2Δ5'-block14xTerB-URA3 bar1::HYG</i>                                    | 2D gel analysis     |
| LSY5060-4   | <i>his2::ade2-n-TRP1- ade2Δ5'-block14xTerB-URA3 leu2::Gal-TUS-LEU2MX bar1::HYG</i>               | 2D gel analysis     |
| LSY5075     | <i>his2::ade2-n-TRP1- ade2Δ5'-block14xTerB-URA3 leu2::Gal-TUS-LEU2MX rad51::HIS3 bar1::HYG</i>   | 2D gel analysis     |
| LSY5062     | <i>his2::ade2-n-TRP1- ade2Δ5'-block14xTerB-URA3 leu2::Gal-TUS-LEU2MX rad59::LEU2 bar1::HYG</i>   | 2D gel analysis     |

All strains are haploids derived from W303 (*leu2-3,112 trp1-1 can1-100 ura3-1 his3-11,15*), *ade2::hisG* and *RAD5* unless otherwise indicated.

## Supplementary References.

- 1 Gnügge, R., Liphardt, T. & Rudolf, F. A shuttle vector series for precise genetic engineering of *Saccharomyces cerevisiae*. *Yeast* **33**, 83-98, doi:10.1002/yea.3144 (2016).
- 2 Liberi, G., C. Cotta-Ramusino, M. Lopes, J. Sogo, C. Conti, A. Bensimon, and M. Foiani. 2006. "Methods to study replication fork collapse in budding yeast." *Methods Enzymol* 409:442-62. doi: 10.1016/S0076-6879(05)09026-9.
