# Supplementary material for: Mechanism for inverted-repeat recombination induced by a replication fork barrier
Source: PubMed Central journal article supplement (PMC8748988; doi:10.1038/s41467-021-27443-w), 2022-01-10
Supplement: 41467_2021_27443_MOESM3_ESM.pdf [file 41467_2021_27443_MOESM3_ESM.pdf]

1 **Description of Additional Supplementary Files**

2

3 **Supplementary Data 1**

4 Description: Specific p-values for data shown in Figures 1-4 and Supplementary Figs. 2.

5

6

7

8
